# Supplementary material
Source: PubMed Central journal article supplement (PMC5566307)
Supplement: AnnalsATS.201610-764OC_ley_data_supplement.pdf [file AnnalsATS.201610-764OC_ley_data_supplement.pdf]

## **Online Data Supplement**

### **Code-Based Diagnostic Algorithms for Idiopathic Pulmonary Fibrosis: Case Validation and Improvement**

Brett Ley, Thomas Urbania, Gail Husson, Eric Vittinghoff, David R. Brush, Mark D. Eisner, Carlos Iribarren, Harold R. Collard

**Table E1.** Exclusionary diagnostic codes

| <b>ICD-9 Code</b> | <b>Description</b>                                                                                                                                                                                                                                   |
|-------------------|------------------------------------------------------------------------------------------------------------------------------------------------------------------------------------------------------------------------------------------------------|
| 135               | Sarcoidosis                                                                                                                                                                                                                                          |
| 237.7             | Neurofibromatosis                                                                                                                                                                                                                                    |
| 272.7             | Lipidoses                                                                                                                                                                                                                                            |
| 277.3             | Amyloidosis                                                                                                                                                                                                                                          |
| 277.8             | Other specified disorders of metabolism—includes eosinophilic granuloma                                                                                                                                                                              |
| 446.21            | Goodpasture's syndrome                                                                                                                                                                                                                               |
| 446.4             | Wegener's granulomatosis                                                                                                                                                                                                                             |
| 495               | Extrinsic allergic alveolitis                                                                                                                                                                                                                        |
| 500               | Coal workers' pneumoconiosis                                                                                                                                                                                                                         |
| 501               | Asbestosis                                                                                                                                                                                                                                           |
| 502               | Pneumoconiosis due to other silica or silicates                                                                                                                                                                                                      |
| 503               | Pneumoconiosis due to other inorganic dust                                                                                                                                                                                                           |
| 504               | Pneumoconiosis due to inhalation of other dust                                                                                                                                                                                                       |
| 505               | Pneumoconiosis, unspecified                                                                                                                                                                                                                          |
| 506.4             | Chronic respiratory conditions due to fumes or vapors                                                                                                                                                                                                |
| 508.1             | Chronic and other pulmonary manifestations due to radiation                                                                                                                                                                                          |
| 508.8             | Respiratory conditions due to other specified external agents                                                                                                                                                                                        |
| 516.0             | Pulmonary alveolar proteinosis                                                                                                                                                                                                                       |
| 516.1             | Idiopathic pulmonary hemosiderosis                                                                                                                                                                                                                   |
| 516.32-516.37     | Idiopathic nonspecific interstitial pneumonia, acute interstitial pneumonia, respiratory bronchiolitis interstitial pneumonia, idiopathic lymphoid interstitial pneumonia, cryptogenic organizing pneumonia, and desquamative interstitial pneumonia |
| 516.2             | Pulmonary alveolar microlithiasis                                                                                                                                                                                                                    |
| 516.8             | Other specified alveolar and parietoalveolar pneumonopathies                                                                                                                                                                                         |
| 516.9             | Unspecified alveolar and parietoalveolar pneumonopathies                                                                                                                                                                                             |
| 517.0             | Lung involvement in conditions classified elsewhere                                                                                                                                                                                                  |
| 517.2             | Lung involvement in systemic sclerosis                                                                                                                                                                                                               |
| 517.8             | Lung involvement in other diseases classified elsewhere                                                                                                                                                                                              |
| 518.3             | Pulmonary eosinophilia                                                                                                                                                                                                                               |
| 555               | Regional enteritis                                                                                                                                                                                                                                   |
| 710.0             | Systemic lupus erythematosus                                                                                                                                                                                                                         |
| 710.1             | Systemic sclerosis                                                                                                                                                                                                                                   |
| 710.2             | Sjögren's disease                                                                                                                                                                                                                                    |
| 710.3             | Dermatomyositis                                                                                                                                                                                                                                      |
| 710.4             | Polymyositis                                                                                                                                                                                                                                         |
| 714.81            | Rheumatoid lung                                                                                                                                                                                                                                      |
| 720               | Ankylosing spondylitis                                                                                                                                                                                                                               |
| 759.5             | Tuberous sclerosis                                                                                                                                                                                                                                   |

**Table E2.** Procedure codes for lung biopsy and chest CT scan

| <b>Procedure</b>                  | <b>ICD-9-CM</b>         | <b>CPT-4</b>                              |
|-----------------------------------|-------------------------|-------------------------------------------|
| <b>Chest CT</b>                   | 87.41                   | 71250, 71260, 71270                       |
| <b>Surgical lung biopsy</b>       | 33.20<br>33.28<br>34.21 | 32095-97, 32100-32160,<br>32602, 32607-8, |
| <b>Transbronchial lung biopsy</b> | 33.27                   | 31628, 31629, 31632                       |

**Table E3.** Outcome of the ILD expert diagnosis case adjudication procedure in the first 75 cases meeting criteria for the IPF algorithm

| Clinical*<br>Review | Radiology Review** |                 |                          |                 |                | Total     |
|---------------------|--------------------|-----------------|--------------------------|-----------------|----------------|-----------|
|                     | Definite<br>UIP    | Possible<br>UIP | Inconsistent<br>with UIP | No ILD          | No CT          |           |
| Likely IPF          | 15 <sup>a</sup>    | 12 <sup>a</sup> | 9 <sup>b</sup>           | 0               | 0              | <b>36</b> |
| Insufficient        | 0                  | 1 <sup>c</sup>  | 2 <sup>c</sup>           | 0               | 4 <sup>d</sup> | <b>7</b>  |
| Unlikely IPF        | 3 <sup>e</sup>     | 5 <sup>f</sup>  | 3 <sup>g</sup>           | 1 <sup>g</sup>  | 0              | <b>12</b> |
| Not IPF             | 0                  | 0               | 4 <sup>g</sup>           | 16 <sup>g</sup> | 0              | <b>20</b> |
| <b>Total</b>        | <b>18</b>          | <b>18</b>       | <b>18</b>                | <b>17</b>       | <b>4</b>       | <b>75</b> |

\*Based on clinician chart review, cases were categorized as Likely IPF, Insufficient, Unlikely IPF, and Not IPF

\*\*Expert chest radiologist categorized CT patterns as “No ILD” or, if ILD was present, then as Definite, Possible, or Inconsistent with UIP based on consensus criteria

Case adjudication as IPF, unclassifiable, or Not IPF:

- a. All cases were considered IPF.
- b. Three cases were considered IPF, 6 cases were considered unclassifiable.
- c. All cases were considered unclassifiable.
- d. These cases were not evaluable due to lack of a CT scan available for review.
- e. All cases were considered not IPF. Diagnoses included drug toxicity from nitrofurantoin (n=1) & rheumatoid arthritis-associated ILD (n = 2).
- f. Two cases were considered unclassifiable. Three cases were considered not IPF, and diagnoses included asbestosis (n = 1), chemotherapy/radiation-induced ILD (n = 1), and emphysema with minimal smoking-related fibrosis (n = 1).
- g. All cases were considered not IPF.

Abbreviations: IPF = idiopathic pulmonary fibrosis; UIP = usual interstitial pneumonia; ILD = interstitial lung disease; CT = computed tomography

Study ID: \_\_\_\_\_

**Data Collection Form: Chart Review**

|                                                                                                                                                                                                                                           |                                                                                                                                                                                                                                                                   |
|-------------------------------------------------------------------------------------------------------------------------------------------------------------------------------------------------------------------------------------------|-------------------------------------------------------------------------------------------------------------------------------------------------------------------------------------------------------------------------------------------------------------------|
| <p><b>Demographics</b></p> <p>Age at diagnosis: _____</p> <p>Sex: M   F</p>                                                                                                                                                               | <p><b>Bronchoscopy</b></p> <p>Bronchoscopy: Y   N</p> <p>TBB: Y   N</p> <p>Interpretation: _____</p> <p>BAL cell diff: _____</p>                                                                                                                                  |
| <p><b>Chart Diagnosis</b></p> <p>Seen by pulmonologist? Yes   No</p> <p>Pulmonary diagnosis IPF   Other: _____</p>                                                                                                                        | <p><b>Exposures</b></p> <p>Smoker: Current   Former   Never</p> <p>PPY: _____</p> <p>Asbestos: Y   N, Comment: _____</p> <p>HP exposure: Y   N, Comment: _____</p> <p>Radiation: Y   N, Comment: _____</p> <p>Drug: Y   N, Comment: _____</p> <p>Other: _____</p> |
| <p><b>Pulmonary Function Tests</b></p> <p>PFTs done: Y   N</p> <p>TLC % predicted: _____ %</p> <p>FVC % predicted: _____ %</p> <p>FEV:FVC ratio: _____</p> <p>DLCO % predicted: _____ %</p>                                               | <p><b>Associated Conditions</b></p> <p>List relevant:</p>                                                                                                                                                                                                         |
| <p><b>Imaging</b></p> <p>CT chest: Y   N      HRCT? Y   N</p> <p><b>Report classification:</b></p> <p>Definite   Possible   Inconsistent   No ILD</p> <p><b>TU classification:</b></p> <p>Definite   Possible   Inconsistent   No ILD</p> | <p><b>Serologies</b></p> <p>ANA: Y / N   pos / neg   titer: _____</p> <p>RF: Y / N   pos / neg   titer: _____</p> <p>CCP: Y / N   pos / neg   titer: _____</p> <p>CK: Y / N   level: _____</p> <p>Other serologies: _____</p>                                     |
| <p><b>Biopsy</b></p> <p>Surgical lung biopsy: Y   N</p> <p>Interpretation: _____</p>                                                                                                                                                      | <p><b>Other Comments:</b></p>                                                                                                                                                                                                                                     |

**Confidence in IPF based on Chart Review:**

Likely IPF | Insufficient | Unlikely IPF | Not IPF

1. **Likely IPF** – evidence of ILD AND no persuasive alternative cause of def/prob UIP pattern
2. **Insufficient** – inadequate information to evaluate ILD (e.g. no CT scan)
3. **Unlikely IPF** – persuasive alternative cause for a def/prob UIP pattern (e.g. RA, drug)
4. **Not IPF** – evidence against presence of any ILD or clear alternative diagnosis

**Figure E1.** Data collection form used for medical record data extraction

| Clinical review | Radiology Review |              |                 |           |          | Total     |
|-----------------|------------------|--------------|-----------------|-----------|----------|-----------|
|                 | Definite UIP     | Possible UIP | Incon. with UIP | No ILD    | No CT    |           |
| Likely IPF      |                  |              |                 |           |          | <b>36</b> |
| Insufficient    |                  |              |                 |           |          | <b>7</b>  |
| Unlikely IPF    |                  |              |                 |           |          | <b>12</b> |
| Not IPF         |                  |              |                 |           |          | <b>20</b> |
| <b>Total</b>    | <b>18</b>        | <b>18</b>    | <b>18</b>       | <b>17</b> | <b>4</b> | <b>75</b> |

IPF    
 Adjudicate    
 Not IPF    
 Exclude

**Figure E2.** ILD expert diagnosis algorithm using information from medical record review and chest CT scan pattern

Abbreviations: IPF = idiopathic pulmonary fibrosis, ILD = interstitial lung disease, UIP = usual interstitial pneumonia, Incon. = inconsistent, CT = computed tomography

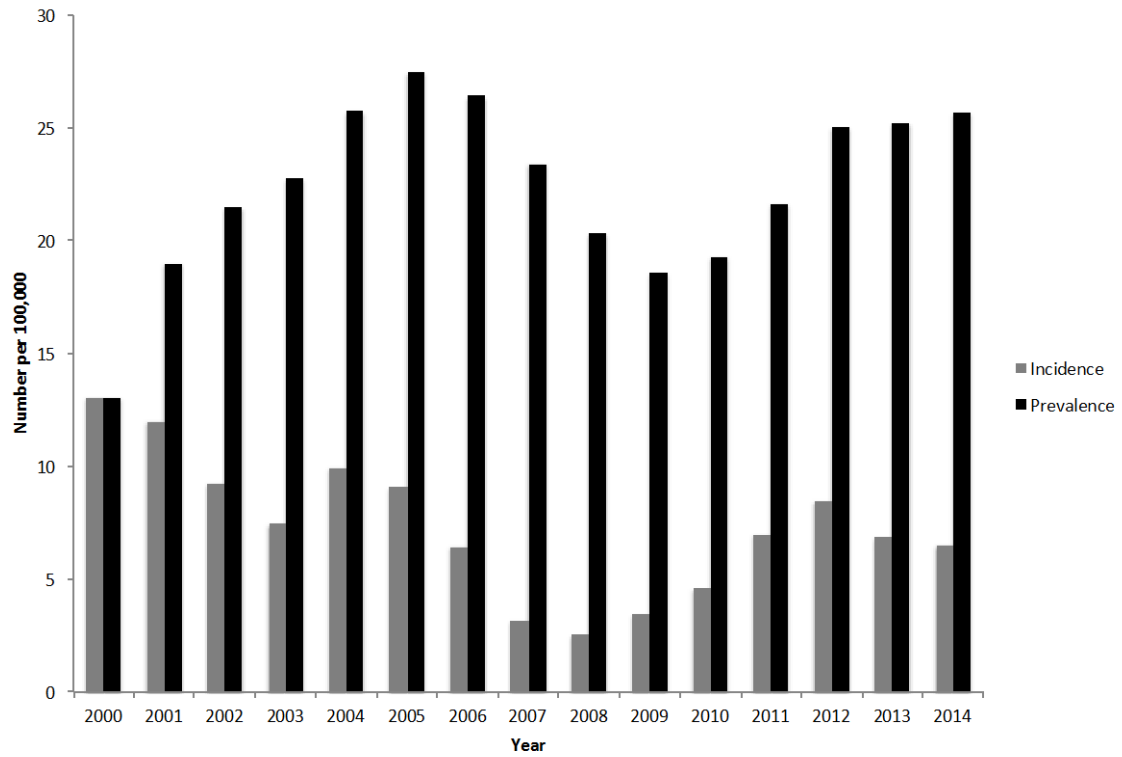

**Figure E3.** Annual incidence and cumulative prevalence of cases identified by the idiopathic pulmonary fibrosis (IPF) algorithm
